# Supplementary material
Source: ML conference proceedings conference paper supplement (https://openreview.net/forum?id=uxurbfWwRr)

Case I

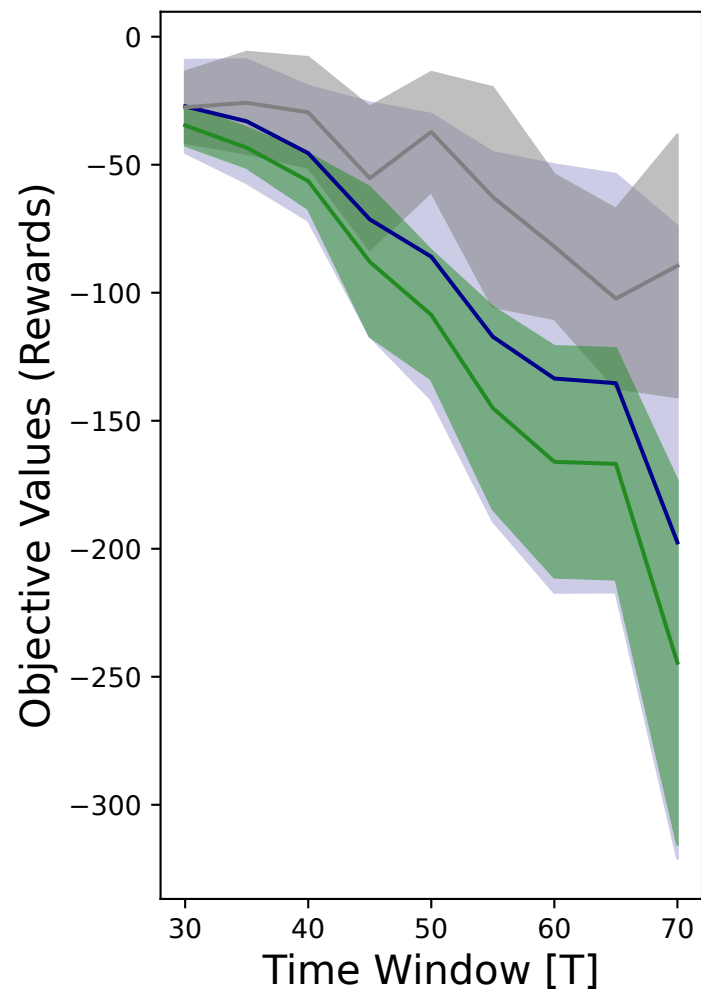

Case II

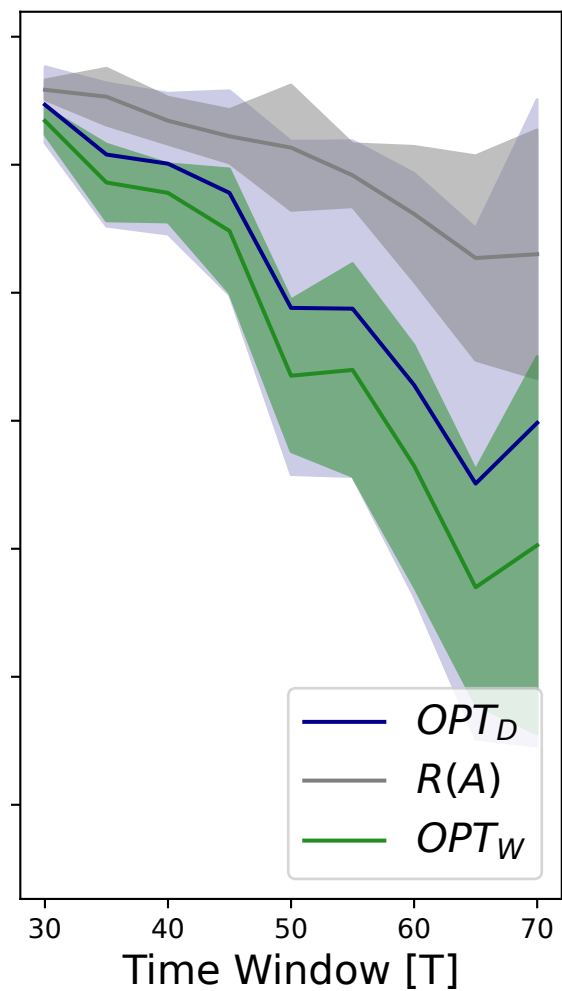

Supplement: supplementary_material [file attachment]

Case I

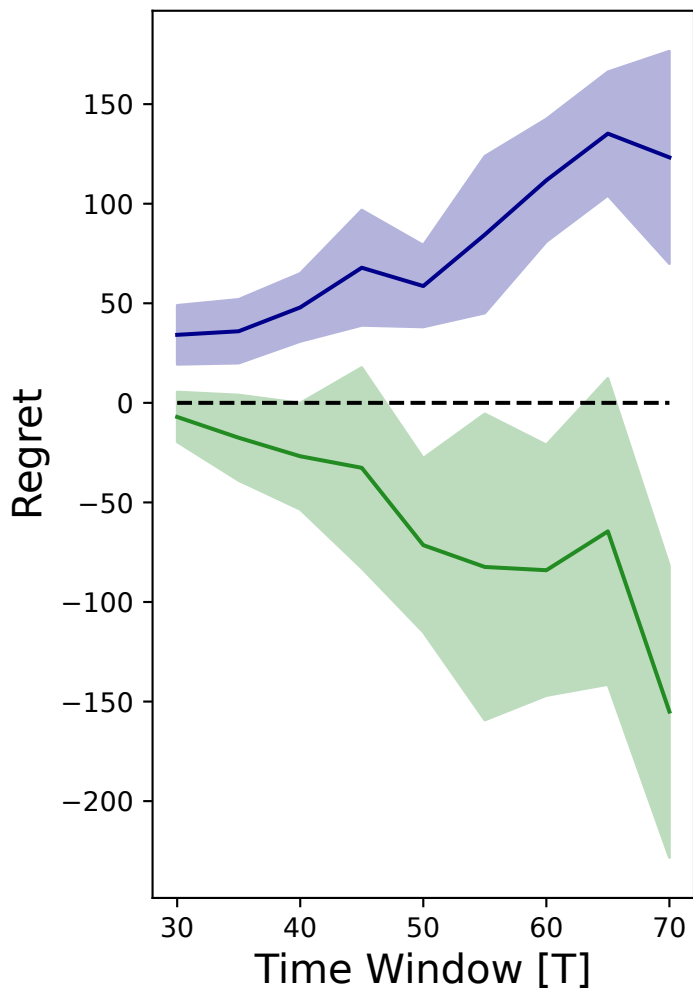

Case II

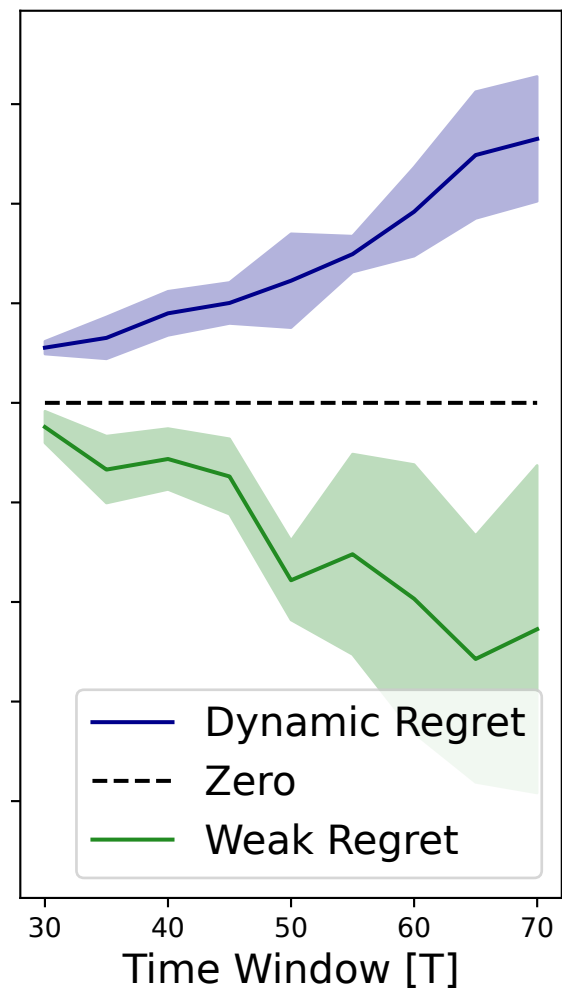

Supplement: supplementary_material [file attachment]
